# Supplementary material
Source: PubMed Central journal article supplement (PMC8752135)
Supplement: aem.01793-21-s0001.pdf [file aem.01793-21-s0001.pdf]

Table S1. Amino acid sequence comparison of MbnT in *Methylocystis* sp. SB2 with 30 identified TonB-dependent transporters in *Methylosinus trichosporium* OB3b

| Gene locus tag <sup>1</sup> | Identity (%) | E value         |
|-----------------------------|--------------|-----------------|
| <b>10210 (MbnT2)</b>        | <b>57.36</b> | <b>0</b>        |
| 12822                       | 32.56        | 3.00E-14        |
| 12005                       | 29.52        | 9.00E-11        |
| 12471                       | 29.32        | 2.00E-07        |
| 11307                       | 28.10        | 1.00E-05        |
| 11588                       | 27.91        | 8.00E-09        |
| 13835                       | 27.88        | 1.00E-03        |
| 10030                       | 27.64        | 2.00E-05        |
| 13035                       | 27.40        | 8.00E-08        |
| 11125                       | 26.83        | 1.00E-06        |
| 11295                       | 26.47        | 6.00E-06        |
| 11411                       | 26.17        | 1.10E-03        |
| 11829                       | 25.96        | 6.00E-03        |
| 14481                       | 25.85        | 3.00E-09        |
| 10151                       | 25.83        | 5.00E-04        |
| 13641                       | 25.59        | 3.00E-05        |
| 20043                       | 25.12        | 2.00E-05        |
| 20011                       | 25.10        | 2.00E-06        |
| <b>13651 (MbnT1)</b>        | <b>25.00</b> | <b>3.00E-04</b> |
| 10208                       | 24.92        | 2.00E-10        |
| 13988                       | 24.69        | 2.00E-04        |
| 10117                       | 24.50        | 1.50E-03        |
| 12052                       | 24.27        | 1.00E-05        |
| 12284                       | 23.50        | 5.00E-04        |
| 12266                       | 23.19        | 2.00E-04        |
| 10250                       | 23.03        | 4.00E-04        |
| 20138                       | 22.33        | 4.00E-05        |
| 13925                       | 21.77        | 2.00E-06        |
| 13850                       | 21.74        | 3.00E-04        |
| 14264                       | 21.28        | 9.00E-05        |

<sup>1</sup>gene locus tag according to the genome of *Methylosinus trichosporium* OB3b (WGS ADVE02.2)

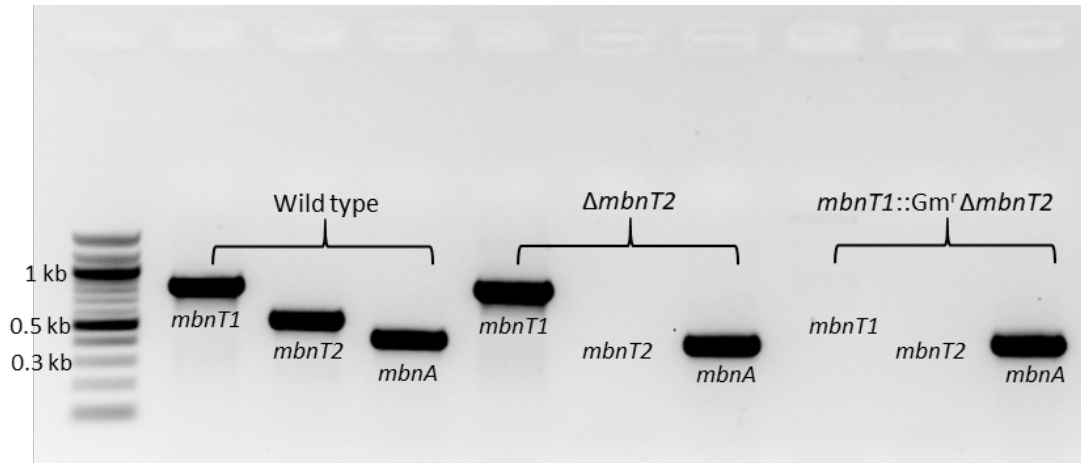

**Fig. S1** Verification of the targeted gene deletion in the mutants by PCR with genomic DNAs extracted from wild type *M. trichosporium* OB3b and the constructed mutants shown in the figure.

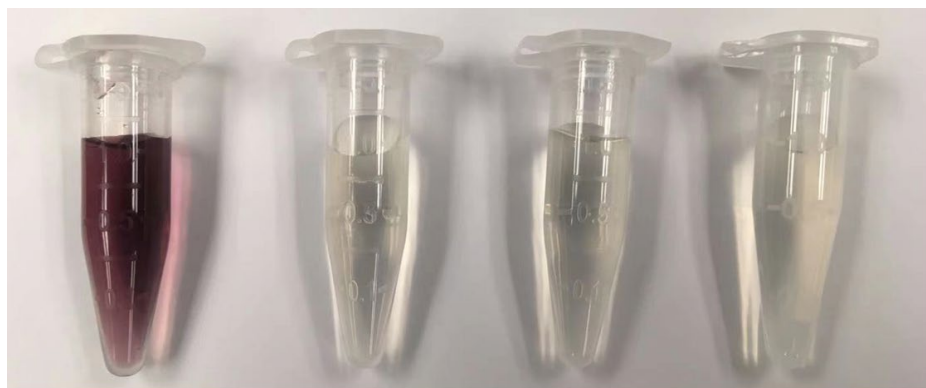

0  $\mu\text{M}$  Cu

1  $\mu\text{M}$  Cu

1  $\mu\text{M}$  Cu +  
5  $\mu\text{M}$  MB-OB3b

1  $\mu\text{M}$  Cu +  
5  $\mu\text{M}$  MB-SB2

**Fig. S2** Naphthalene assay for sMMO activity in *M. trichosporium*  $\Delta\text{mbnT2}$  mutant cells. Naphthalene assay was performed using actively grown cells under the indicated conditions as described earlier (1).

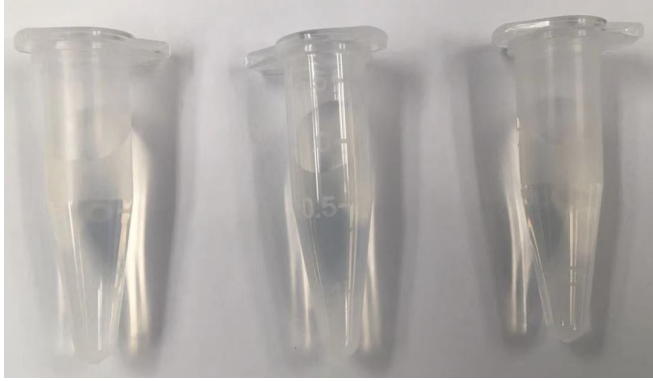

**Fig. S3** Naphthalene assay for sMMO activity in *M. trichosporium mbnT1::Gm<sup>r</sup> ΔmbnT2* mutant cells grown without copper. The assay was performed with *M. trichosporium mbnT1::Gm<sup>r</sup> ΔmbnT2* culture after three consecutive transfer in NMS medium without addition of copper.

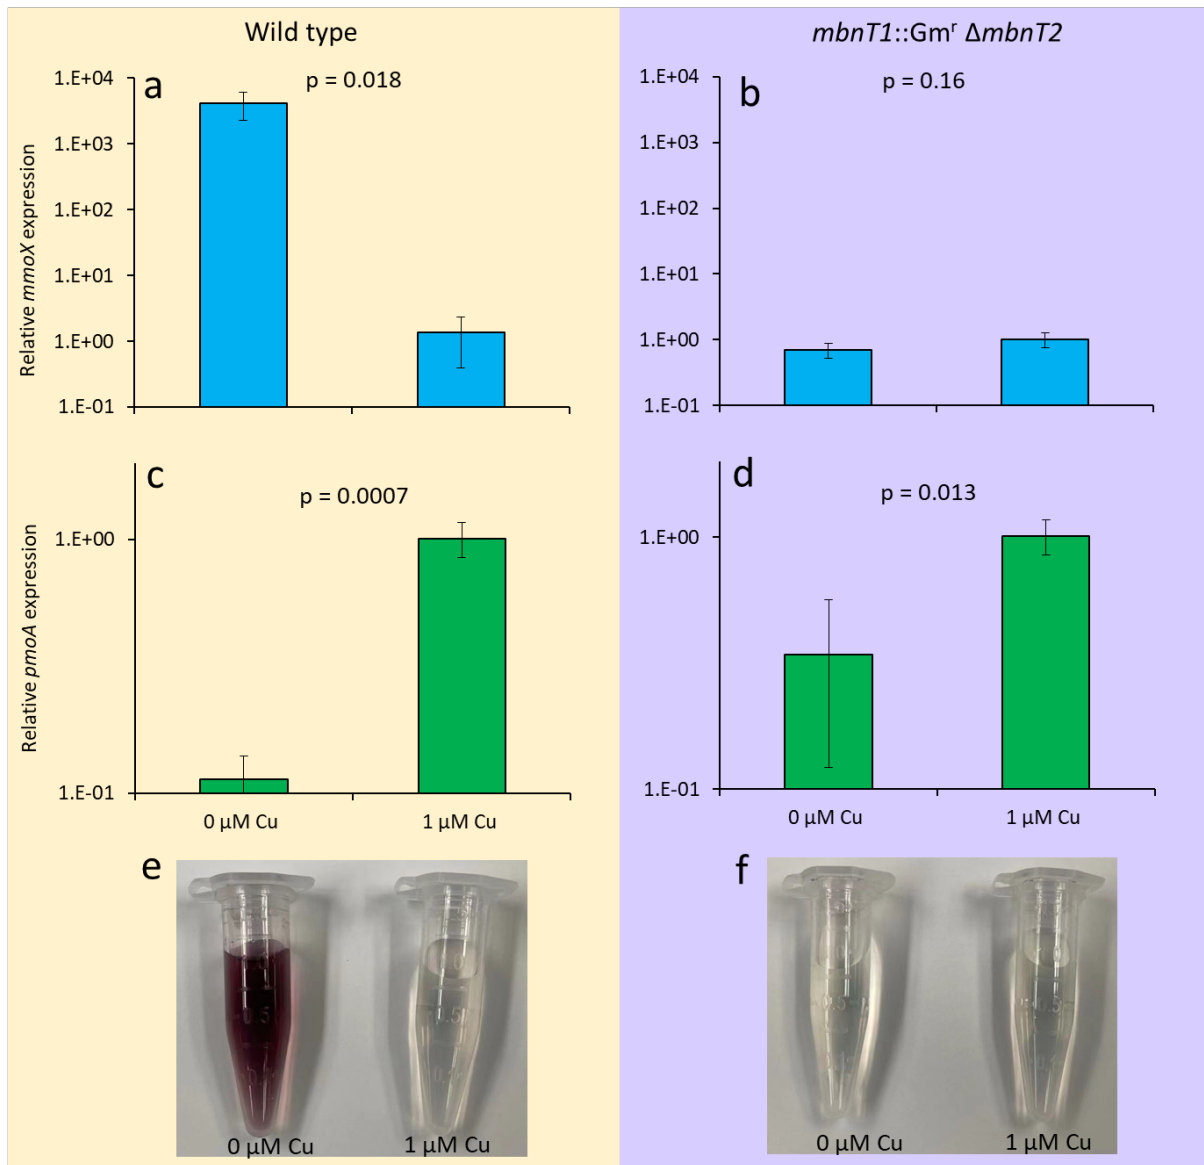

**Fig. S4** RT-qPCR analysis of the relative expression of *mmoX* (a-b) and *pmoA* (c-d), and naphthalene assay for sMMO activity (e-f) in *M. trichosporium* OB3b wild type (left panel) *mbnT1::Gm<sup>r</sup> ΔmbnT2* mutant (right panel) grown in 0.5% methanol with and without copper. Error bars indicate standard deviations from triplicate biological cultures. T-test was performed for variance analysis between the growth conditions.

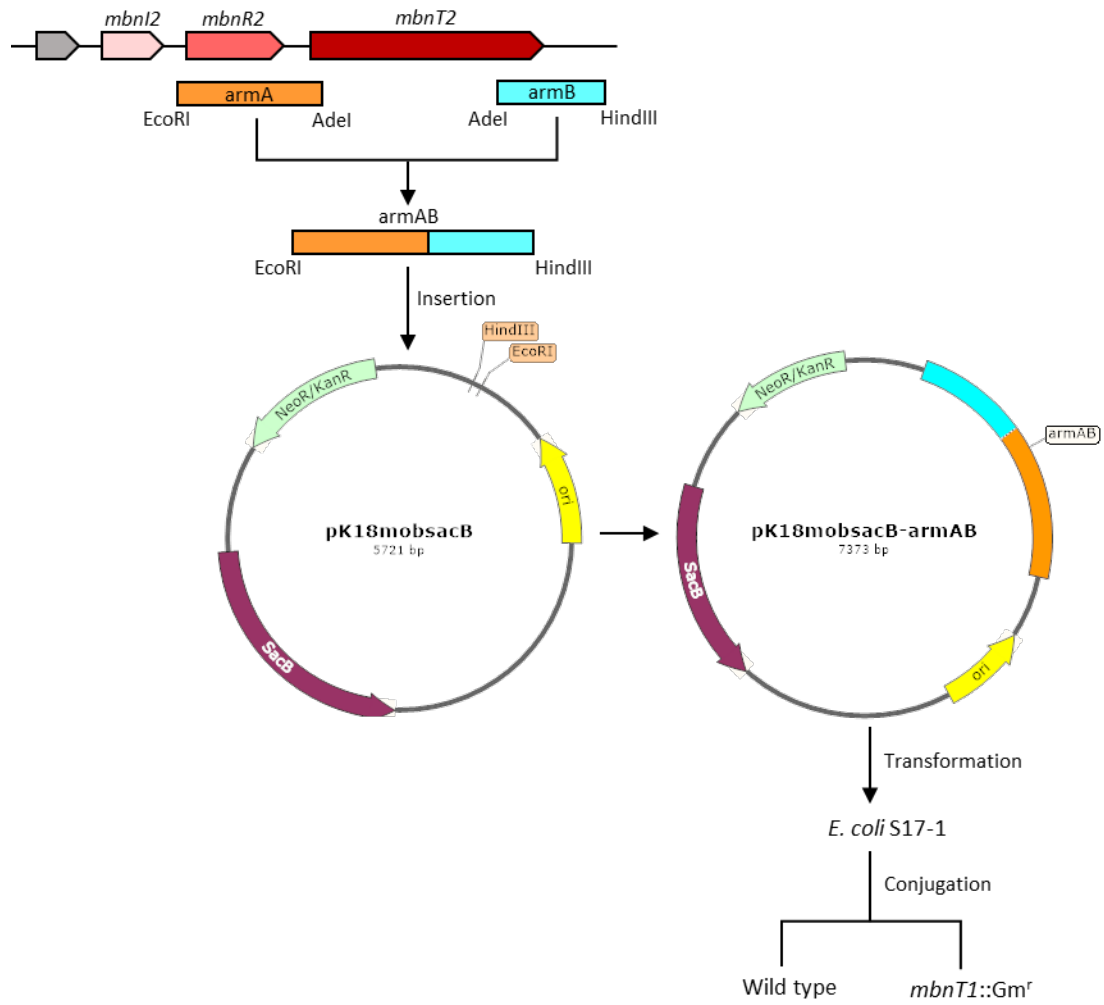

**Fig. S5** Schematic representation of the *M. trichosporium* mutant construction.

## References

1. Farhan Ul-Haque M, Kalidass B, Vorobev A, Baral BS, DiSpirito AA, Semrau JD. 2015. Methanobactin from *Methylocystis* sp. strain SB2 affects gene expression and methane monooxygenase activity in *Methylosinus trichosporium* OB3b. *Appl Environ Microbiol* 81:2466-2473.
2. Semrau JD, DiSpirito AA, Obulisamy PK, Kang-Yun CS. 2020. Methanobactin from methanotrophs: genetics, structure, function and potential applications. *FEMS Microbiol Lett* 367:fnaa045.
